# Supplementary material for: Ratiometric fluorescent detection of CN− based on CN−-promoted interruption of π-conjugation of a coumarin-bearing Michael receptor
Source: Royal Society of Chemistry journal article supplement (doi:10.1039/c3ra44245d), 2013-01-01
Supplement: c3ra44245d.pdf [file c3ra44245d.pdf]

## Electronic Supplementary Information (ESI†)

### **Ratiometric fluorescent detection of $\text{CN}^-$ based on $\text{CN}^-$ - promoted interruption of the $\pi$ -conjugation of a coumarin-containing Michael receptor**

Xianshu Zhou,<sup>a</sup> Weihua Mu,<sup>a</sup> Xin Lv\*<sup>b</sup> and Diansheng Liu\*<sup>c</sup>

<sup>a</sup> *School of Chemistry and Chemical Engineering, Yunnan Normal University, Kunming 650500, China*

<sup>b</sup> *School of Chemistry and Chemical Engineering, Shanxi University, Taiyuan 030006, China.*

<sup>c</sup> *Institute of Applied Chemistry, Shanxi University, Taiyuan 030006, China;*

*E-mail: lvxin19831025@163.com*

## 1. General information and methods

All reagents and solvents were purchased from commercial sources ( Aladdin Reagent Company, Shanghai, China ) and were of the highest grade. Solvents were dried according to standard procedures. All reactions were magnetically stirred and monitored by thin-layer chromatography (TLC) using Qingdao Yuminyuan Chemicals GF254 silica gel coated plates. Flash chromatography (FC) was performed using silica gel 60 (200–300 mesh) obtained from the Qingdao Ocean Chemicals. Absorption spectra were taken on an Agilent 8453 spectrophotometer using a 1-cm quartz cell. Fluorescence spectra were taken on Varian Cary Eclipse fluorescence spectrometer. High resolution mass spectra were obtained on a Varian QFT-ESI mass spectrometer. The  $^1\text{H}$  NMR and  $^{13}\text{C}$  NMR spectra were obtained on Bruker ARX300 nuclear magnetic resonance spectrometer at 300 and 75 MHz, respectively ( TMS as internal standard ). The following abbreviations were used to explain the multiplicities: s = singlet; d = doublet; t = triplet; q = quartet; m = multiplet; br = broad.

## 2. Procedures of sensing

Cyanide anion and the other anions were prepared from  $n\text{-Bu}_4\text{N}$  salts. A stock solution of **1** (10 mM) was prepared in DMF. The stock solution of **1** was then diluted to the corresponding concentration (10  $\mu\text{M}$ ) with the solution of  $\text{CH}_3\text{CN}$ . The tetrabutylammonium cyanide stock solution of  $1.0 \times 10^{-1}$  M was diluted to  $1.0 \times 10^{-2}$  M and  $1.0 \times 10^{-3}$  M with  $\text{CH}_3\text{CN}$  for spectra titration studies. Spectral data were recorded in an indicated time after the addition.

## 3. Synthesis<sup>S1</sup>

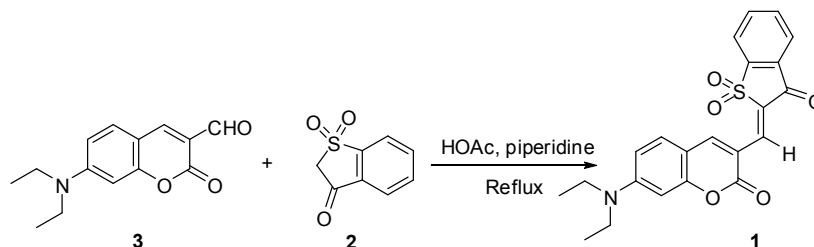

To a solution of coumarin aldehyde **3**<sup>S2</sup> (245 mg, 1.00 mmol) and benzo[b]thiophene-3(2H)-one 1,1-dioxide **2** (218 mg, 1.20 mmol) in glacial acetic

acid (10 mL) was added 3 drops of piperidine. The reaction mixture was then refluxed for 1 h, and the solvent was removed under reduced pressure. The resulting residue was purified by column chromatography (dichloromethane / acetone, 100:1) on silica gel to give the product **1** as a darkblue solid (299 mg, yield: 73%). Mp: 227–228 °C. <sup>1</sup>H NMR (300 MHz, CDCl<sub>3</sub>): δ(ppm) 8.93 (s, 1H), 8.49 (s, 1H), 8.11 (d, *J* = 7.5, 1H), 8.03 (d, *J* = 7.5, 1H), 7.80-7.93 (m, 2H), 7.49 (d, *J* = 7.5, 1H), 6.66 (d, *J* = 9.0, 1H), 6.47 (s, 1H), 3.50 (q, *J* = 6.6, 4H), 1.27 (t, *J* = 6.3, 6H); <sup>13</sup>C NMR (75 MHz, CDCl<sub>3</sub>): δ 13.29, 30.42, 46.25, 97.87, 110.38, 110.46, 121.90, 125.464, 128.264, 133.75, 134.92, 136.71, 139.76, 144.30, 149.79, 154.79, 159.30, 161.84, 178.66; ESI-MS *m/z* 432.0878 (100%, [M + Na]<sup>+</sup>), [M+Na]<sup>+</sup> calculated 432.0876.

## References

- [S1] J. Griffiths, V. Millar, G. S. Bahra, *Dyes and Pigments*, 1995; **28**, 327–39.  
[S2] J.-S. Wu, W.-M. Liu, X.-Q. Zhuang, F. Wang, P.-F. Wang, S.-L. Tao, X.-H. Zhang, S.-K. Wu, S.-T. Lee, *Org. Lett.* 2006; **9**: 33–36.

#### 4. Supplemental spectra

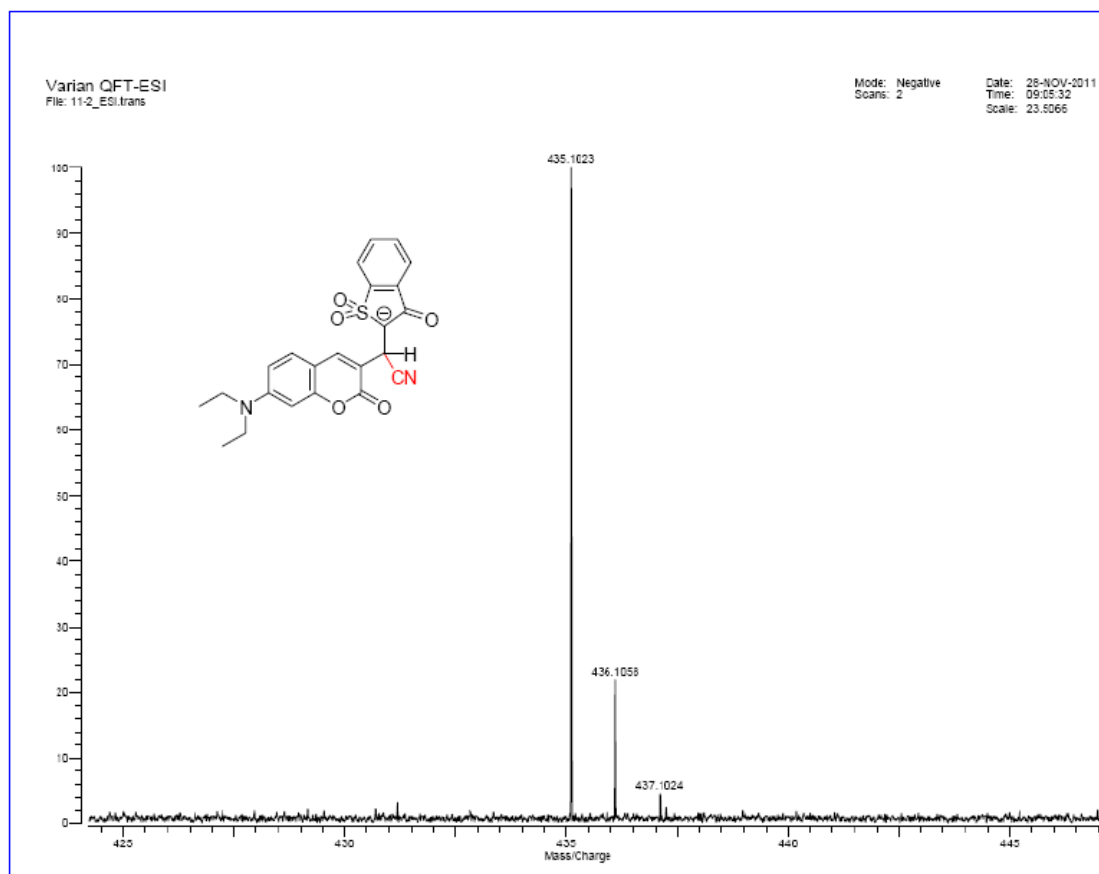

**Figure S1** The HRMS for 1-CN adduct.

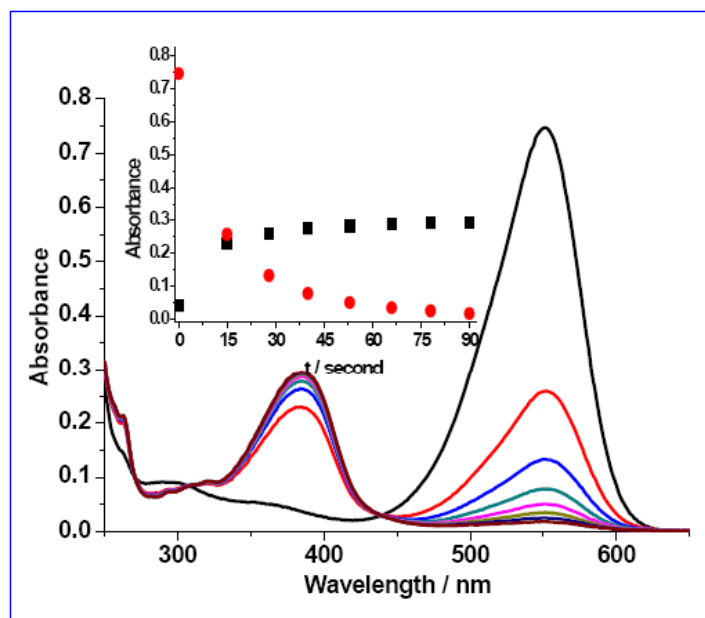

**Figure S2** The kinetic study of the response of the probe **1** to  $\text{CN}^-$  at 25 °C in  $\text{CH}_3\text{CN}$ .

Condition:  $[\mathbf{1}] = 10 \mu\text{M}$ ,  $[\text{CN}] = 20 \mu\text{M}$ .

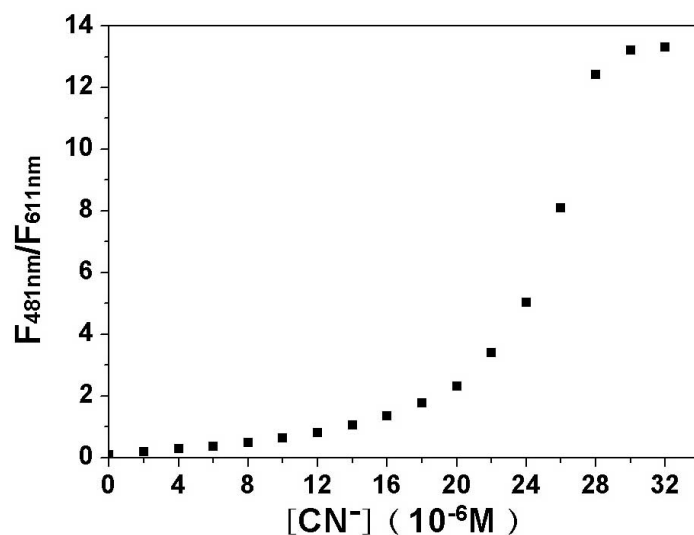

**Figure S3** Fluorescence intensity ratio changes ( $F_{481}/F_{611}$ ) of **1** upon gradual addition of  $\text{CN}^-$ .  $\lambda_{\text{ex}} = 440 \text{ nm}$ . Slits: 5 nm/10 nm.

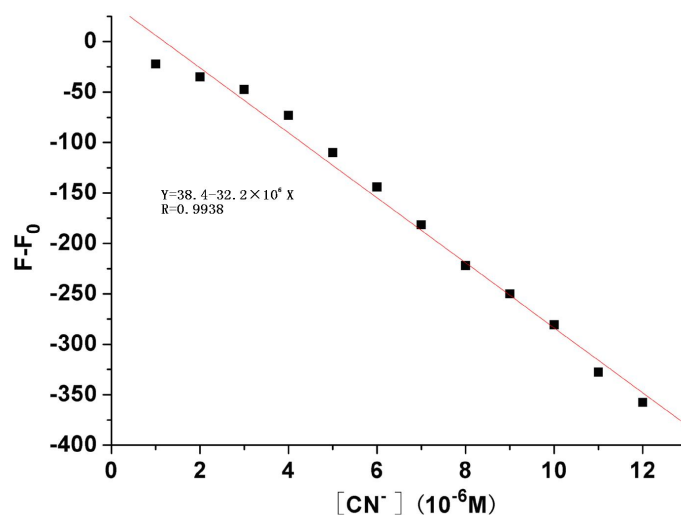

**Figure S4** Linear concentration range of  $\text{CN}^-$  (**1**: 10.0  $\mu\text{M}$ ) in  $\text{CH}_3\text{CN}$  ( $\lambda_{\text{ex}} = 440 \text{ nm}$ ,  $F_0$ : Fluorescence intensity at 611 nm in the absence of  $\text{CN}^-$ ,  $F$ : Fluorescence intensity at 611 nm in the presence of  $\text{CN}^-$ ).

The corresponding quantitative analytical data (linear concentration range, LOD) were determined using a reported procedure (C. Tong, G. Xiang, *J. Lumin.*, 2007, **126**, 575–580. C. Tong, G. Xiang, *J. Lumin.*, 2007, **126**, 575–580; and Y. Peng, A.J. Zhang, M. Dong and et al. *Chem. Commun.*, 2011,47, 4505-4507).

The result of the analysis as follows:

$$\text{Linear Equation: } Y = 38.4 - 32.2 \times X \quad R=0.9938, \quad S=38.42177 \times 10^6$$

$$\delta = \sqrt{\frac{\sum (F_0 - \bar{F}_0)^2}{N-1}} = 4.227068231 \quad N=10 \quad K=3$$

$$\text{LOD} = K \times \delta / S = 3.30 \times 10^{-7} \text{ M}$$

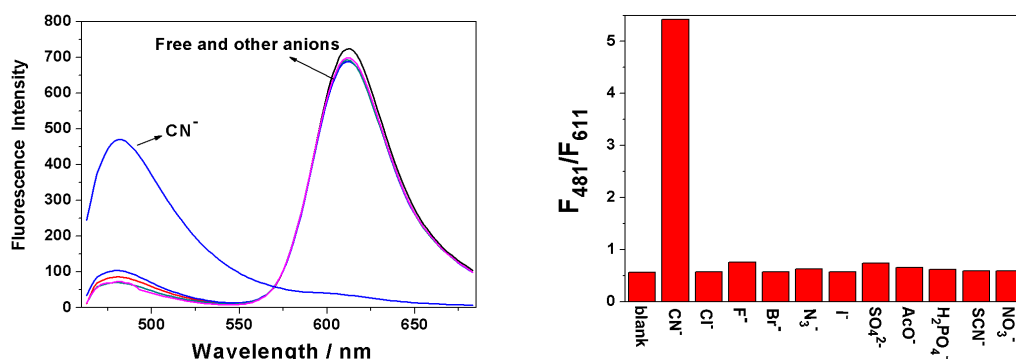

**Figure S5** The fluorescence spectra of **1** (10  $\mu\text{M}$ ) upon addition of various anions (30  $\mu\text{M}$ ) in MeCN.

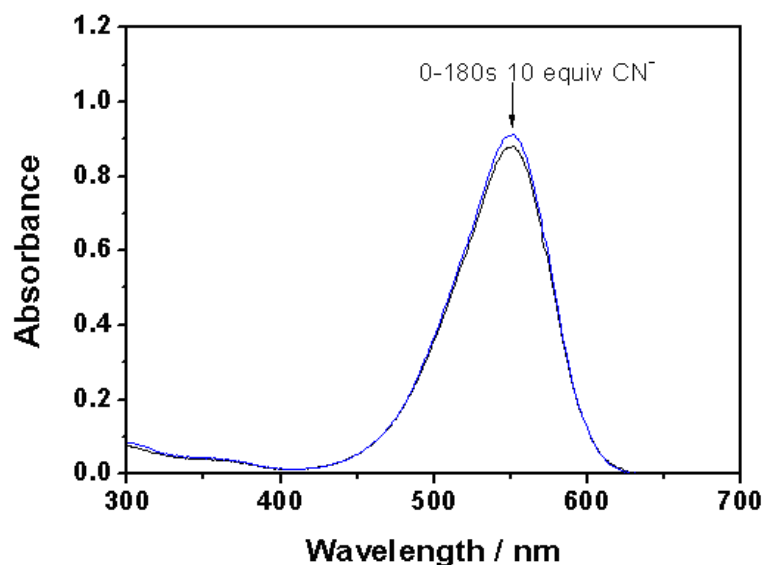

**Figure S6** Changes in absorption spectra of **1** (10  $\mu\text{M}$ ) measured in 9:1 CH<sub>3</sub>CN-HEPES buffer (10 mM, pH = 7.4) at 25°C upon addition of 100  $\mu\text{M}$  n-Bu<sub>4</sub>NCN

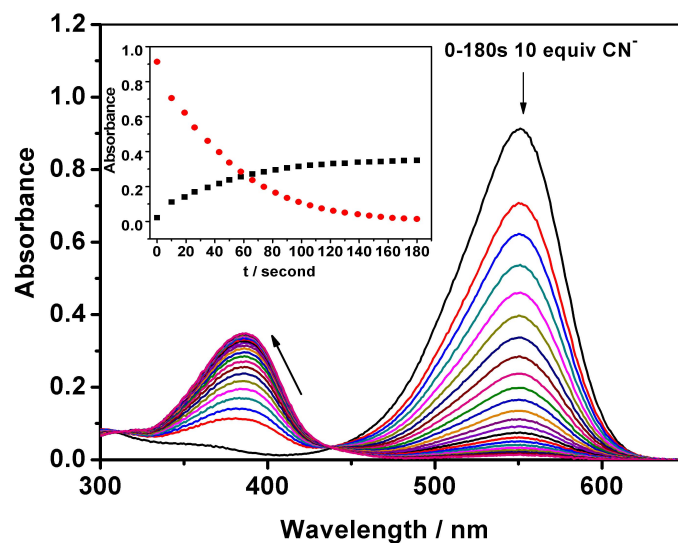

**Figure S7** Changes in absorption spectra of **1** (10 μM) measured in 9:1 CH<sub>3</sub>CN-HEPES buffer (10 mM, pH = 7.4) at 50°C upon addition of 100 μM n-Bu<sub>4</sub>NCN. Inset: Absorbance intensity vs time change of **1** at 550 nm (red dot) and 384 nm (black dot) upon addition of 100 μM n-Bu<sub>4</sub>NCN. λ<sub>ex</sub> = 440 nm. Slits: 5 nm/10 nm.

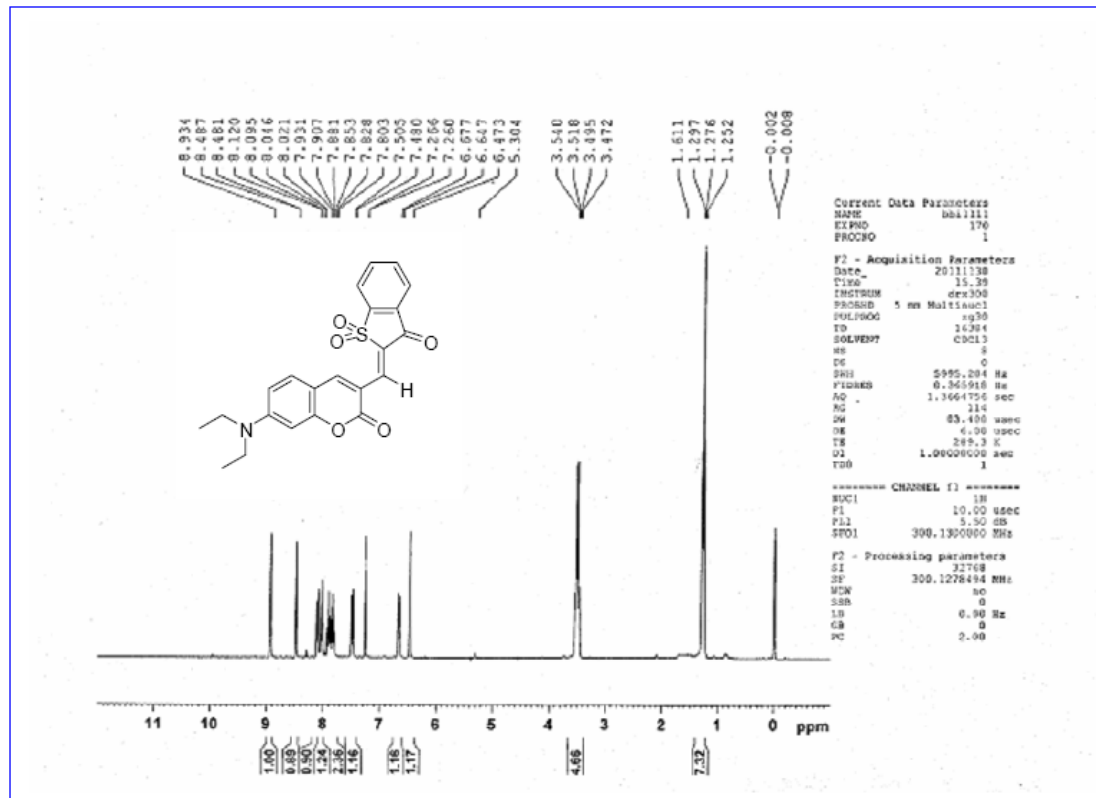

**Figure S8** <sup>1</sup>H NMR charts of **1** (CDCl<sub>3</sub>).

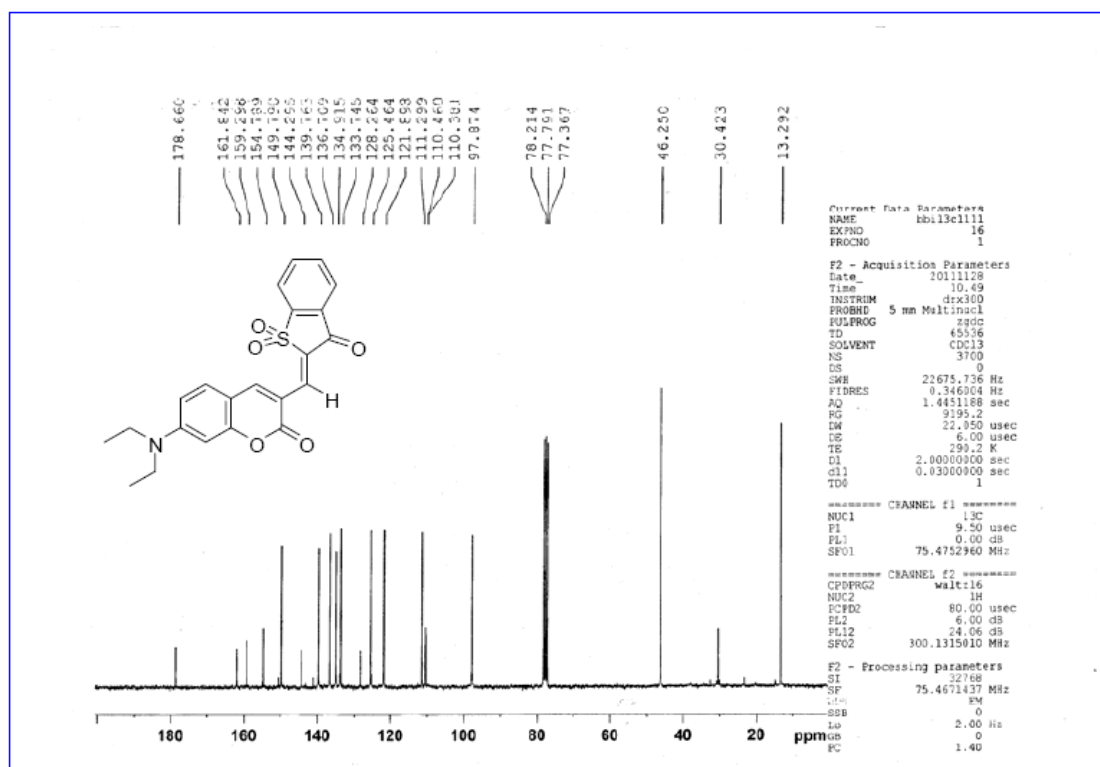

Figure S9  $^{13}\text{C}$  NMR charts of 1 ( $\text{CDCl}_3$ ).

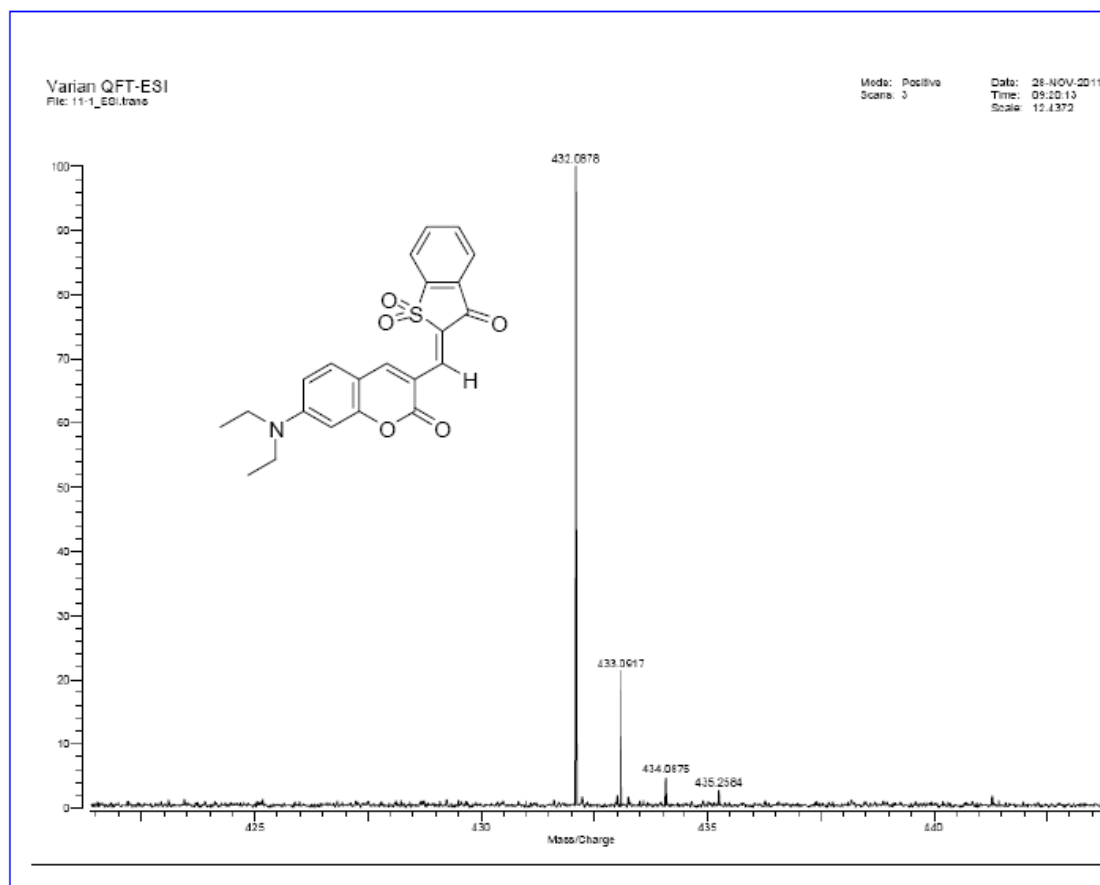

Figure S10 HRMS chart of 1.



## 5. Z-matrix and total energy of 1 and 1-CN<sup>-</sup>

### 1: SCRF-B3LYP/6-311++G(d,p)

Charge = 0 Multiplicity = 1

SCF Done: E(RB3LYP) = -1679.169338 a.u.

Number of Imaginary frequencies: n.a.

Symbolic Z-matrix:

|   |    |     |    |     |    |     |
|---|----|-----|----|-----|----|-----|
| C |    |     |    |     |    |     |
| C | 1  | B1  |    |     |    |     |
| C | 2  | B2  | 1  | A1  |    |     |
| C | 3  | B3  | 2  | A2  | 1  | D1  |
| C | 4  | B4  | 3  | A3  | 2  | D2  |
| C | 1  | B5  | 2  | A4  | 3  | D3  |
| H | 3  | B6  | 2  | A5  | 1  | D4  |
| H | 4  | B7  | 3  | A6  | 2  | D5  |
| H | 5  | B8  | 4  | A7  | 3  | D6  |
| H | 6  | B9  | 1  | A8  | 2  | D7  |
| C | 2  | B10 | 1  | A9  | 6  | D8  |
| S | 1  | B11 | 6  | A10 | 5  | D9  |
| C | 11 | B12 | 2  | A11 | 1  | D10 |
| O | 11 | B13 | 2  | A12 | 1  | D11 |
| O | 12 | B14 | 1  | A13 | 6  | D12 |
| O | 12 | B15 | 1  | A14 | 6  | D13 |
| C | 13 | B16 | 11 | A15 | 2  | D14 |
| H | 17 | B17 | 13 | A16 | 11 | D15 |
| C | 17 | B18 | 13 | A17 | 11 | D16 |
| C | 19 | B19 | 17 | A18 | 13 | D17 |
| C | 19 | B20 | 17 | A19 | 13 | D18 |
| C | 20 | B21 | 19 | A20 | 17 | D19 |
| O | 21 | B22 | 19 | A21 | 17 | D20 |
| C | 23 | B23 | 21 | A22 | 19 | D21 |
| H | 20 | B24 | 19 | A23 | 17 | D22 |
| O | 21 | B25 | 19 | A24 | 17 | D23 |
| C | 22 | B26 | 20 | A25 | 19 | D24 |
| C | 27 | B27 | 22 | A26 | 20 | D25 |
| C | 24 | B28 | 23 | A27 | 21 | D26 |
| C | 29 | B29 | 24 | A28 | 23 | D27 |
| H | 27 | B30 | 22 | A29 | 20 | D28 |
| H | 28 | B31 | 27 | A30 | 22 | D29 |
| H | 29 | B32 | 24 | A31 | 23 | D30 |
| N | 30 | B33 | 29 | A32 | 24 | D31 |
| C | 34 | B34 | 30 | A33 | 29 | D32 |
| H | 35 | B35 | 34 | A34 | 30 | D33 |
| H | 35 | B36 | 34 | A35 | 30 | D34 |

|   |    |     |    |     |    |     |
|---|----|-----|----|-----|----|-----|
| C | 34 | B37 | 30 | A36 | 29 | D35 |
| H | 38 | B38 | 34 | A37 | 30 | D36 |
| H | 38 | B39 | 34 | A38 | 30 | D37 |
| C | 35 | B40 | 34 | A39 | 30 | D38 |
| H | 41 | B41 | 35 | A40 | 34 | D39 |
| H | 41 | B42 | 35 | A41 | 34 | D40 |
| H | 41 | B43 | 35 | A42 | 34 | D41 |
| C | 38 | B44 | 34 | A43 | 30 | D42 |
| H | 45 | B45 | 38 | A44 | 34 | D43 |
| H | 45 | B46 | 38 | A45 | 34 | D44 |
| H | 45 | B47 | 38 | A46 | 34 | D45 |

|     |            |
|-----|------------|
| B1  | 1.39369845 |
| B2  | 1.39463673 |
| B3  | 1.39287440 |
| B4  | 1.40004622 |
| B5  | 1.38617276 |
| B6  | 1.08411010 |
| B7  | 1.08443897 |
| B8  | 1.08453862 |
| B9  | 1.08432423 |
| B10 | 1.48883379 |
| B11 | 1.79025994 |
| B12 | 1.47777003 |
| B13 | 1.22270115 |
| B14 | 1.47583002 |
| B15 | 1.47706562 |
| B16 | 1.36212400 |
| B17 | 1.08878348 |
| B18 | 1.42796313 |
| B19 | 1.39169732 |
| B20 | 1.46850396 |
| B21 | 1.39800524 |
| B22 | 1.38492876 |
| B23 | 1.36757501 |
| B24 | 1.08284955 |
| B25 | 1.21144620 |
| B26 | 1.41985839 |
| B27 | 1.36700328 |
| B28 | 1.37430165 |
| B29 | 1.42188055 |
| B30 | 1.08528476 |
| B31 | 1.07976373 |
| B32 | 1.07976597 |

|     |              |
|-----|--------------|
| B33 | 1.35773515   |
| B34 | 1.47314143   |
| B35 | 1.09087803   |
| B36 | 1.09234729   |
| B37 | 1.47384192   |
| B38 | 1.09095618   |
| B39 | 1.09179117   |
| B40 | 1.53265829   |
| B41 | 1.09335239   |
| B42 | 1.09171746   |
| B43 | 1.09210001   |
| B44 | 1.53230476   |
| B45 | 1.09176184   |
| B46 | 1.09340417   |
| B47 | 1.09219932   |
| A1  | 119.35226657 |
| A2  | 118.77049781 |
| A3  | 120.86745390 |
| A4  | 122.93979729 |
| A5  | 119.89050192 |
| A6  | 119.70991777 |
| A7  | 119.71376610 |
| A8  | 121.67614602 |
| A9  | 114.54532130 |
| A10 | 125.96947910 |
| A11 | 111.26484545 |
| A12 | 124.14595673 |
| A13 | 110.76522370 |
| A14 | 110.52202754 |
| A15 | 121.85983960 |
| A16 | 112.17102830 |
| A17 | 134.09294048 |
| A18 | 126.53514402 |
| A19 | 114.85881833 |
| A20 | 121.97489789 |
| A21 | 117.26487412 |
| A22 | 123.53937336 |
| A23 | 120.48606546 |
| A24 | 126.49152324 |
| A25 | 124.44502689 |
| A26 | 121.58171037 |
| A27 | 117.26215622 |
| A28 | 120.01053446 |
| A29 | 118.67367034 |

|     |               |
|-----|---------------|
| A30 | 118.47636398  |
| A31 | 117.81464010  |
| A32 | 121.29585519  |
| A33 | 121.32370456  |
| A34 | 106.79218909  |
| A35 | 108.82171014  |
| A36 | 121.66975283  |
| A37 | 106.67201472  |
| A38 | 108.94420528  |
| A39 | 114.48644959  |
| A40 | 109.42019767  |
| A41 | 111.33143546  |
| A42 | 111.73850185  |
| A43 | 114.50303177  |
| A44 | 111.38024489  |
| A45 | 109.43638854  |
| A46 | 111.67095947  |
| D1  | 0.00870791    |
| D2  | 0.00000000    |
| D3  | -0.02763566   |
| D4  | 180.00000000  |
| D5  | -180.00000000 |
| D6  | -179.98684800 |
| D7  | -179.97358839 |
| D8  | 179.97041256  |
| D9  | 179.99038511  |
| D10 | 0.07835156    |
| D11 | -179.85537831 |
| D12 | -65.18164637  |
| D13 | 64.83511179   |
| D14 | -177.95972105 |
| D15 | 0.92342027    |
| D16 | -179.71489153 |
| D17 | 6.80478133    |
| D18 | -174.33230590 |
| D19 | 179.86606590  |
| D20 | 179.86416117  |
| D21 | 0.58813227    |
| D22 | 0.98742316    |
| D23 | 0.06674746    |
| D24 | -179.88215353 |
| D25 | 179.94347919  |
| D26 | 179.72581548  |
| D27 | -179.96997888 |

|     |               |
|-----|---------------|
| D28 | -0.00626848   |
| D29 | -179.61012696 |
| D30 | -0.15189959   |
| D31 | -178.58598482 |
| D32 | -1.32971772   |
| D33 | 156.34827078  |
| D34 | 42.17819095   |
| D35 | -179.48992334 |
| D36 | -155.75850964 |
| D37 | -41.64316573  |
| D38 | -81.99570285  |
| D39 | 178.43465649  |
| D40 | -62.27006917  |
| D41 | 58.81393253   |
| D42 | 82.66089434   |
| D43 | 61.88283557   |
| D44 | -178.80001488 |
| D45 | -59.18630681  |

**1-CN: SCRF-B3LYP/6-311++G(d,p)**

Charge = -1 Multiplicity = 1

SCF Done: E(RB3LYP)=-1772.188231 a.u.

Number of Imaginary frequencies: n.a.

Symbolic Z-matrix:

C

|   |    |     |    |     |    |     |
|---|----|-----|----|-----|----|-----|
| C | 1  | B1  |    |     |    |     |
| C | 2  | B2  | 1  | A1  |    |     |
| C | 3  | B3  | 2  | A2  | 1  | D1  |
| C | 4  | B4  | 3  | A3  | 2  | D2  |
| C | 1  | B5  | 2  | A4  | 3  | D3  |
| H | 3  | B6  | 2  | A5  | 1  | D4  |
| H | 4  | B7  | 3  | A6  | 2  | D5  |
| H | 5  | B8  | 4  | A7  | 3  | D6  |
| H | 6  | B9  | 1  | A8  | 2  | D7  |
| C | 2  | B10 | 1  | A9  | 6  | D8  |
| S | 1  | B11 | 6  | A10 | 5  | D9  |
| C | 11 | B12 | 2  | A11 | 1  | D10 |
| O | 11 | B13 | 2  | A12 | 1  | D11 |
| O | 12 | B14 | 1  | A13 | 6  | D12 |
| O | 12 | B15 | 1  | A14 | 6  | D13 |
| C | 13 | B16 | 11 | A15 | 2  | D14 |
| H | 17 | B17 | 13 | A16 | 11 | D15 |

|   |    |     |    |     |    |     |
|---|----|-----|----|-----|----|-----|
| C | 17 | B18 | 13 | A17 | 11 | D16 |
| C | 19 | B19 | 17 | A18 | 13 | D17 |
| C | 19 | B20 | 17 | A19 | 13 | D18 |
| C | 20 | B21 | 19 | A20 | 17 | D19 |
| O | 21 | B22 | 19 | A21 | 17 | D20 |
| C | 23 | B23 | 21 | A22 | 19 | D21 |
| H | 20 | B24 | 19 | A23 | 17 | D22 |
| O | 21 | B25 | 19 | A24 | 17 | D23 |
| C | 22 | B26 | 20 | A25 | 19 | D24 |
| C | 27 | B27 | 22 | A26 | 20 | D25 |
| C | 24 | B28 | 23 | A27 | 21 | D26 |
| C | 29 | B29 | 24 | A28 | 23 | D27 |
| H | 27 | B30 | 22 | A29 | 20 | D28 |
| H | 28 | B31 | 27 | A30 | 22 | D29 |
| H | 29 | B32 | 24 | A31 | 23 | D30 |
| N | 30 | B33 | 29 | A32 | 24 | D31 |
| C | 34 | B34 | 30 | A33 | 29 | D32 |
| H | 35 | B35 | 34 | A34 | 30 | D33 |
| H | 35 | B36 | 34 | A35 | 30 | D34 |
| C | 34 | B37 | 30 | A36 | 29 | D35 |
| H | 38 | B38 | 34 | A37 | 30 | D36 |
| H | 38 | B39 | 34 | A38 | 30 | D37 |
| C | 35 | B40 | 34 | A39 | 30 | D38 |
| H | 41 | B41 | 35 | A40 | 34 | D39 |
| H | 41 | B42 | 35 | A41 | 34 | D40 |
| H | 41 | B43 | 35 | A42 | 34 | D41 |
| C | 38 | B44 | 34 | A43 | 30 | D42 |
| H | 45 | B45 | 38 | A44 | 34 | D43 |
| H | 45 | B46 | 38 | A45 | 34 | D44 |
| H | 45 | B47 | 38 | A46 | 34 | D45 |
| C | 17 | B48 | 13 | A47 | 11 | D46 |
| N | 49 | B49 | 17 | A48 | 13 | D47 |

|     |            |
|-----|------------|
| B1  | 1.39135815 |
| B2  | 1.38990967 |
| B3  | 1.39905153 |
| B4  | 1.39633774 |
| B5  | 1.38347106 |
| B6  | 1.08429490 |
| B7  | 1.08485238 |
| B8  | 1.08454133 |
| B9  | 1.08457824 |
| B10 | 1.50906003 |
| B11 | 1.80039545 |

|     |              |
|-----|--------------|
| B12 | 1.40478418   |
| B13 | 1.25299548   |
| B14 | 1.48995720   |
| B15 | 1.48874866   |
| B16 | 1.50754084   |
| B17 | 1.09822594   |
| B18 | 1.52310629   |
| B19 | 1.36249161   |
| B20 | 1.45130127   |
| B21 | 1.42247420   |
| B22 | 1.38473518   |
| B23 | 1.37227077   |
| B24 | 1.08684194   |
| B25 | 1.21663324   |
| B26 | 1.40982739   |
| B27 | 1.37578981   |
| B28 | 1.38282079   |
| B29 | 1.41514741   |
| B30 | 1.08550585   |
| B31 | 1.08006909   |
| B32 | 1.07999423   |
| B33 | 1.37141382   |
| B34 | 1.46758166   |
| B35 | 1.09171930   |
| B36 | 1.09351827   |
| B37 | 1.46821031   |
| B38 | 1.09182063   |
| B39 | 1.09290248   |
| B40 | 1.53390172   |
| B41 | 1.09382882   |
| B42 | 1.09207050   |
| B43 | 1.09221123   |
| B44 | 1.53360585   |
| B45 | 1.09212942   |
| B46 | 1.09389080   |
| B47 | 1.09229999   |
| B48 | 1.47618212   |
| B49 | 1.15460269   |
| A1  | 119.08008101 |
| A2  | 118.94220092 |
| A3  | 120.92037031 |
| A4  | 123.27416741 |
| A5  | 119.87618755 |
| A6  | 119.62833826 |

|     |              |
|-----|--------------|
| A7  | 119.92554926 |
| A8  | 121.68438472 |
| A9  | 113.81749331 |
| A10 | 127.37701560 |
| A11 | 111.10499652 |
| A12 | 121.91311242 |
| A13 | 111.29793616 |
| A14 | 109.22155078 |
| A15 | 123.68817621 |
| A16 | 104.25258339 |
| A17 | 115.43558722 |
| A18 | 124.51049571 |
| A19 | 115.69226213 |
| A20 | 121.70579081 |
| A21 | 117.15049508 |
| A22 | 123.27638458 |
| A23 | 120.04898684 |
| A24 | 126.30288652 |
| A25 | 125.12252695 |
| A26 | 121.60624859 |
| A27 | 117.06933659 |
| A28 | 120.02756110 |
| A29 | 118.90732345 |
| A30 | 118.29475505 |
| A31 | 117.71843943 |
| A32 | 121.40480695 |
| A33 | 121.11589691 |
| A34 | 106.96785441 |
| A35 | 108.98333150 |
| A36 | 121.45641643 |
| A37 | 106.86579313 |
| A38 | 109.09068726 |
| A39 | 114.85687368 |
| A40 | 109.71291536 |
| A41 | 111.22925361 |
| A42 | 111.65528440 |
| A43 | 114.86172190 |
| A44 | 111.27265193 |
| A45 | 109.72840282 |
| A46 | 111.59657925 |
| A47 | 111.75559179 |
| A48 | 178.36309139 |
| D1  | -0.02417446  |
| D2  | -0.10249468  |



|     |               |
|-----|---------------|
| D3  | 0.36453906    |
| D4  | 179.90495374  |
| D5  | 179.88933702  |
| D6  | 179.90442929  |
| D7  | 179.68169677  |
| D8  | 179.66377660  |
| D9  | -179.04016819 |
| D10 | 1.63655091    |
| D11 | -177.60201688 |
| D12 | -63.63477570  |
| D13 | 61.94347285   |
| D14 | -175.40717616 |
| D15 | -20.14166782  |
| D16 | -138.12690068 |
| D17 | -101.05765886 |
| D18 | 78.32876603   |
| D19 | 177.99991551  |
| D20 | -177.50363065 |
| D21 | -1.13028506   |
| D22 | -1.75604830   |
| D23 | 3.12192725    |
| D24 | -179.25360428 |
| D25 | 179.21552898  |
| D26 | 179.85855428  |
| D27 | 179.37193182  |
| D28 | -0.36054489   |
| D29 | -179.29820876 |
| D30 | -0.69129585   |
| D31 | -178.35581651 |
| D32 | -1.86019519   |
| D33 | 156.92167833  |
| D34 | 42.76115956   |
| D35 | -179.48516285 |
| D36 | -156.06485679 |
| D37 | -41.95166348  |
| D38 | -81.37039134  |
| D39 | 178.23223785  |
| D40 | -62.33357477  |
| D41 | 58.49995872   |
| D42 | 82.30046694   |
| D43 | 61.96551212   |
| D44 | -178.58829143 |
| D45 | -58.85184118  |
| D46 | 93.20247144   |

D47

-53.64752814
